# Supplementary material
Source: PubMed Central journal article supplement (PMC4108215)
Supplement: NIHMS601843-supplement-BF495390suppdata_pdf.pdf [file NIHMS601843-supplement-BF495390suppdata_pdf.pdf]

**Supplementary Data:**

**On-line Video 1:** Low magnification video showing bioreactor platform stretching the PDMS microtissue wells

**On-line Video 2:** High magnification video showing bioreactor platform stretching the PDMS wells containing cardiac microtissues

**Supplemental Table 1:** Oligonucleotide sequences used

| <b>Gene</b>                   | <b>Forward</b>        | <b>Reverse</b>        |
|-------------------------------|-----------------------|-----------------------|
| <b>GAPDH</b>                  | ACGGGAAACCCATCACCATC  | CTCGTGGTTCACACCCATCA  |
| <b>BAX</b>                    | TCCAGGATCGAGCAGA      | AAGTAGAAGAGGGCAACC    |
| <b>BCL2</b>                   | CTGGTGGACAACATCGCTCTG | GGTCTGCTGACCTCACTTGTG |
| <b><math>\alpha</math>MHC</b> | TGATGACTCCGAGGAGCTTT  | TGACACAGACCCTTGAGCAG  |
| <b><math>\beta</math>MHC</b>  | CCTCGCAATATCAAGGGAAA  | TACAGGTGCATCAGCTCCAG  |
| <b>ANF</b>                    | GAGTGAGCCGAGACAGCAAA  | TTGCTCCAATATGGCCTGGG  |
| <b>BNP</b>                    | GACGGGCTGAGGTTGTTTTA  | ACTGTGGCAAGTTTGTGCTG  |
| <b>SERCA</b>                  | TGCTGGAACCTGTGATCGAG  | AGCGTTTCTCTCCTGCCATA  |

**Supplemental Table 2:** Average force and cross sectional area measurements

|                        | <b>Force (mN)</b>  | <b>Cross Sectional Area (mm<sup>2</sup>)</b> |
|------------------------|--------------------|----------------------------------------------|
| <b>Control</b>         | <b>0.021±0.004</b> | <b>0.073±0.002</b>                           |
| <b>1Hz</b>             | <b>0.021±0.003</b> | <b>0.080±0.016</b>                           |
| <b>5% Strain</b>       | <b>0.009±0.004</b> | <b>0.064±0.012</b>                           |
| <b>5% Strain + 1Hz</b> | <b>0.063±0.058</b> | <b>0.066±0.015</b>                           |

# Supplemental Figure 1

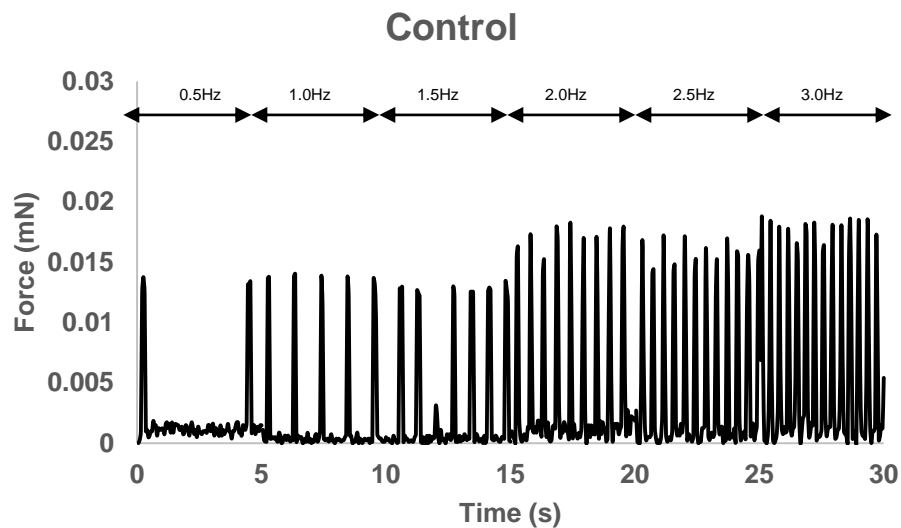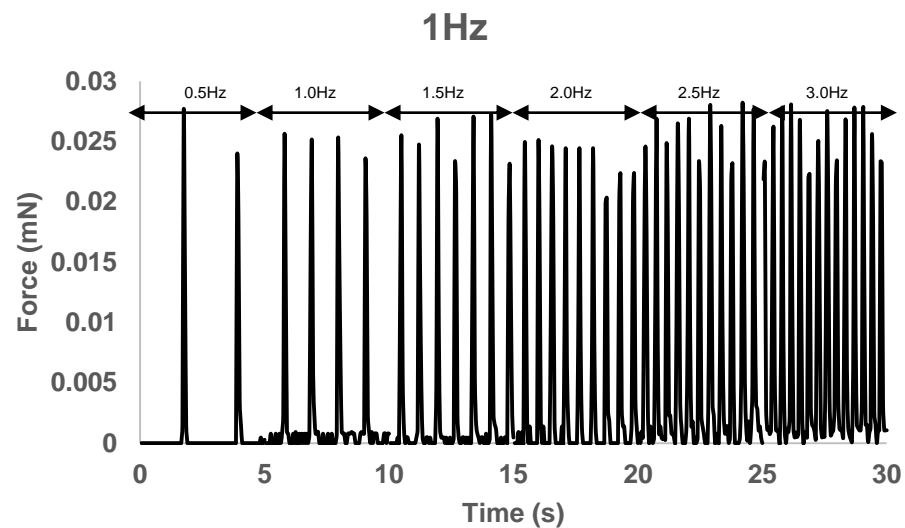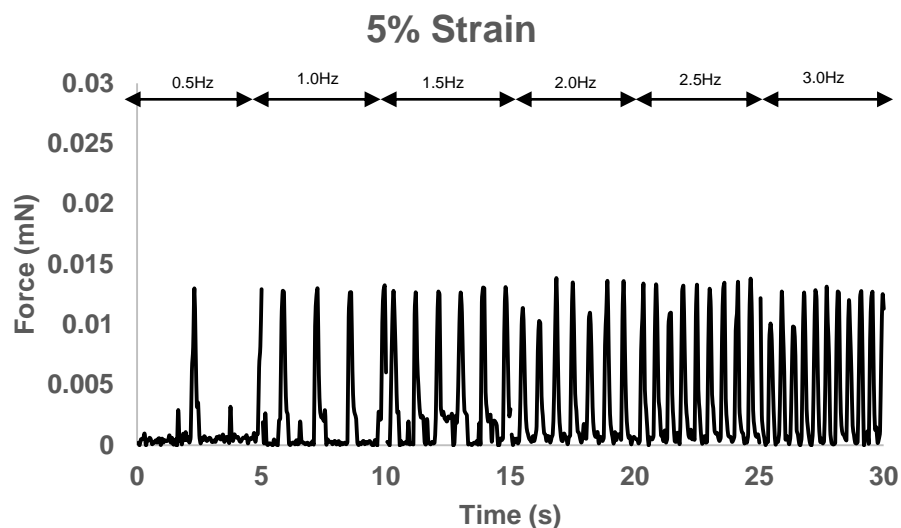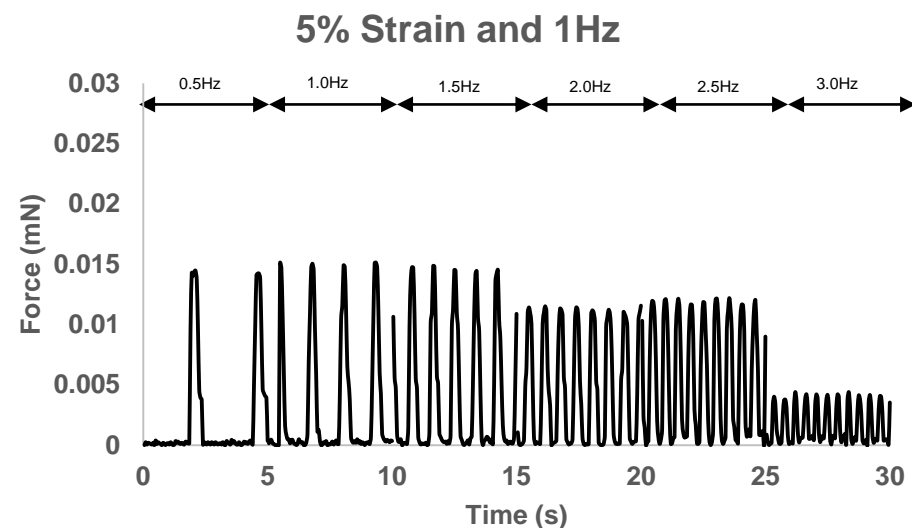

**Supplemental Figure 1:** Representative post deflection traces of the four conditions at increasing pacing frequency starting at 0.5Hz and increasing to 3.0Hz in 0.5Hz increments. Each pacing frequency is shown for 5 seconds.

## Supplemental Figure 2

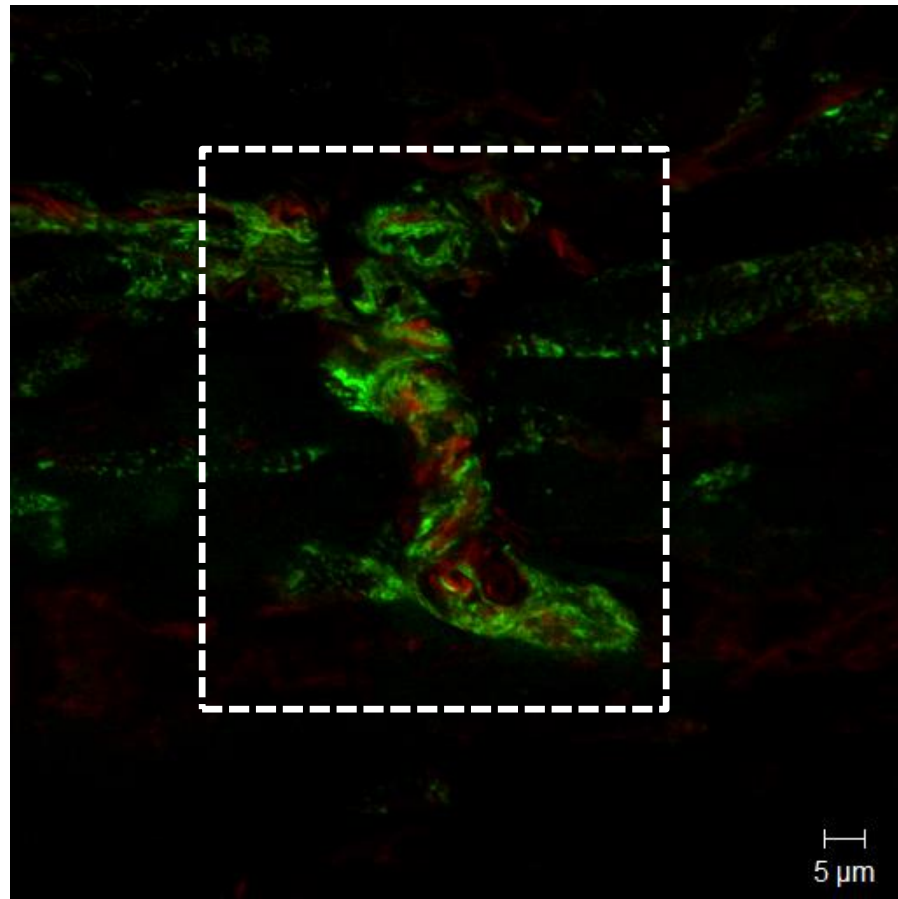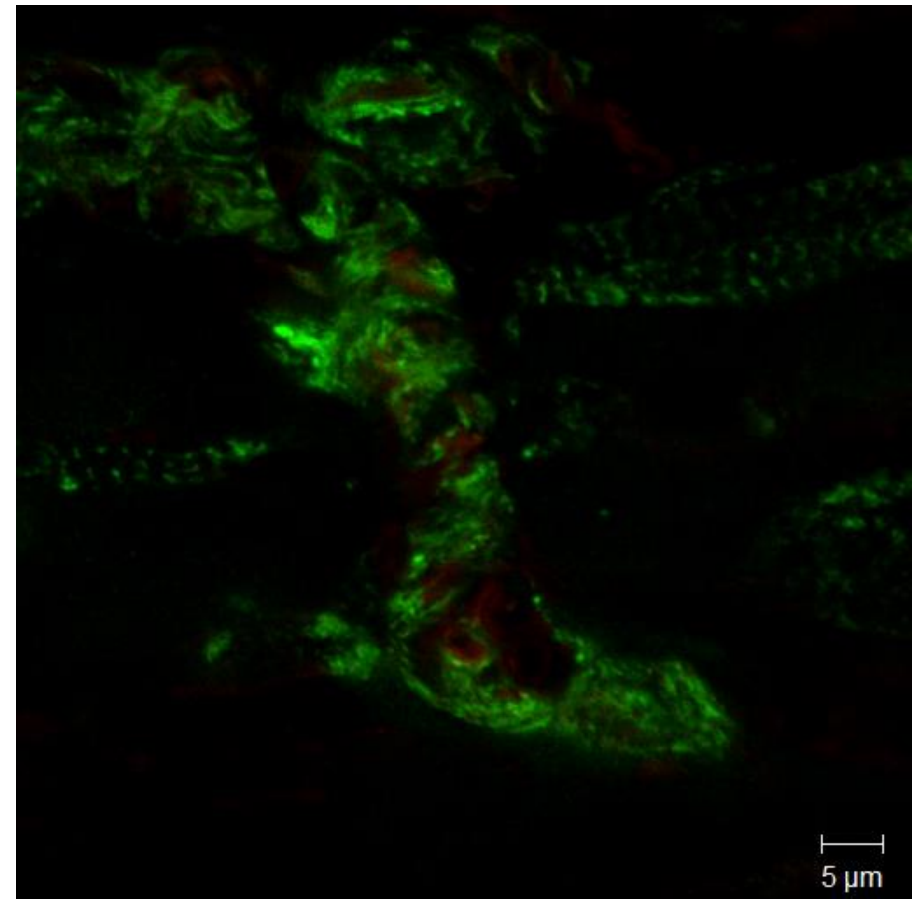

**Supplemental Figure 2:** Regions of myofibrils running perpendicular to the applied 5% static strain (strain applied left to right). Double staining for sarcomeric  $\alpha$ -actinin (green) and actin (red). White box region enlarged in right image.
